# Supplementary material for: Monitoring resistance and resilience using carbon trajectories: Analysis of forest management–disturbance interactions
Source: PubMed Central journal article supplement — Ecol Appl. 2022 Aug 11;32(8):e2704. doi: 10.1002/eap.2704 (PMC10077906; doi:10.1002/eap.2704), 2022-08-11
Supplement: EAP-32-0-s001.pdf [file EAP-32-0-s001.pdf]

**Monitoring resistance and resilience using a carbon trajectories: Analysis of  
forest management–disturbance interactions**

THOMAS S. DAVIS<sup>1,6,8</sup>, ARJAN J. H. MEDDENS<sup>2</sup>, CAMILLE S. STEVENS-RUMANN<sup>1,3</sup>, VINCENT S.  
JANSEN<sup>4</sup>, JASON S. SIBOLD<sup>5,6</sup>, AND MIKE A. BATTAGLIA<sup>7</sup>

**Ecological Applications**

**Appendix S1**

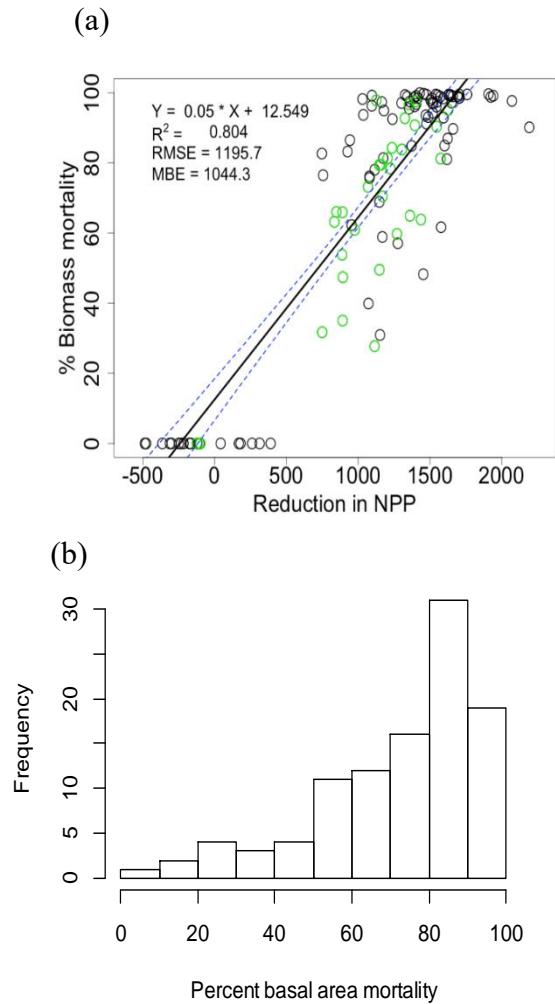

**Figure S1.** (a) Relationship between field-observed biomass mortality (%) and the maximum reduction in NPP ( $\text{gC}/\text{m}^2$ ), illustrating that the Landsat productivity dataset detects changes in forest canopy due to bark beetle-driven overstory tree mortality. Plots include 103 field locations with (b) varying levels of overstory mortality. The green circles indicate plots with >5% aspen and the black circle indicate plots with <5% aspen.

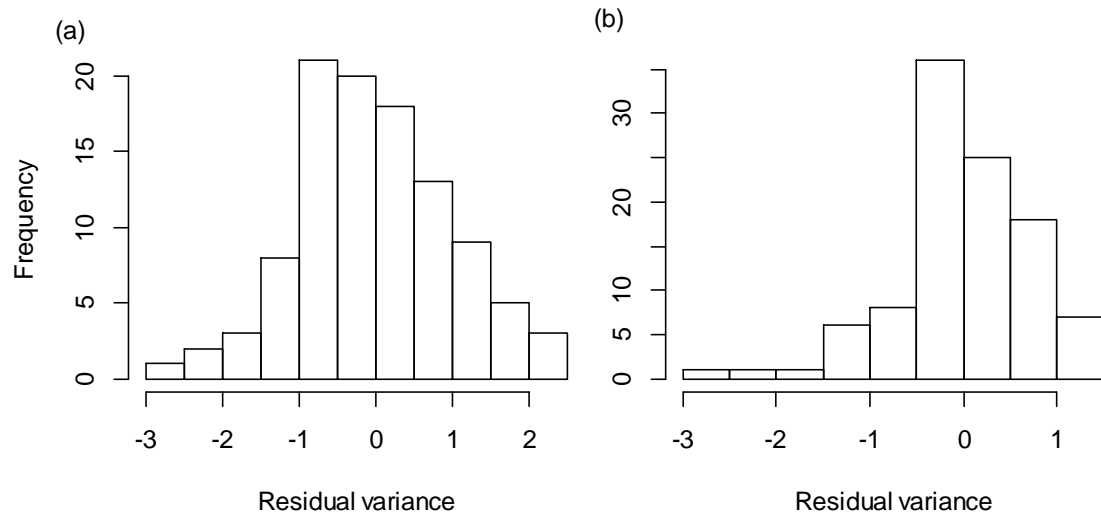

**Figure S2.** Distribution of residual variance in (a) resistance (dNPP<sub>max</sub>) and (b) resilience (αNPP) metrics extracted from ANOVA models testing fixed effects of forest treatment.

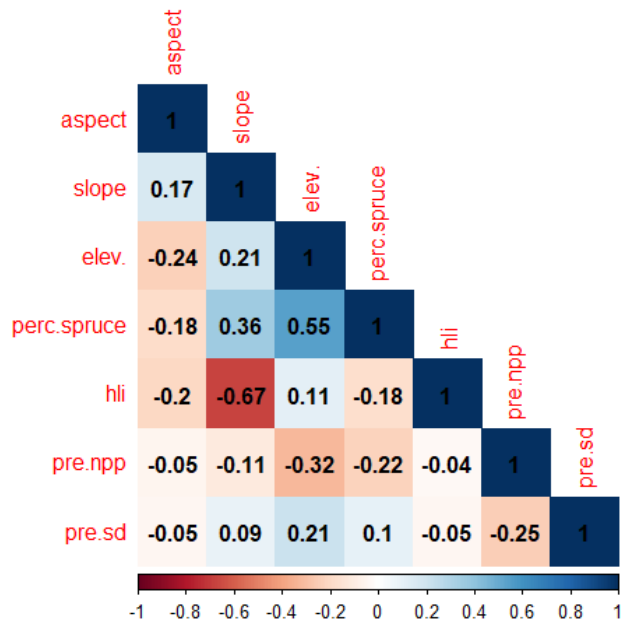

**Figure S3.** A correlation matrix of environmental predictor variables used in generalized linear model analysis. Stand structural variables were not included because pre- and post-disturbance values were used for modelling resistance and resilience, respectively. Abbreviations are as follows: elev=elevation, perc.spruce=percent of stand basal area comprised of Engelmann spruce, hli=heat load index, pre.npp=pre-outbreak mean net primary productivity, and sd.npp=standard deviation of pre-outbreak net primary productivity.

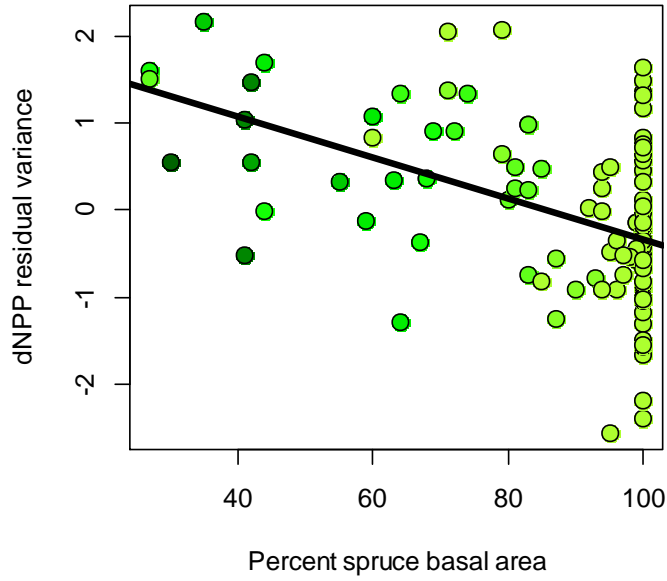

**Figure S4.** Residual variance in resistance ( $dNPP_{max}$ ) regressed against a percent spruce composition (by basal area) within study stands. Symbols are colored by the proportion (%) of aspen (*P. tremuloides*) basal area in the stand, where darker green hues indicate a higher proportion of aspen basal area.
